# Supplementary material for: The origin, global distribution, and functional impact of the human 8p23 inversion polymorphism
Source: HighWire-hosted journal article supplement (doi:10.1101/gr.126037.111), 2012-03-07
Supplement: Supplementary_tables_Fin00.xlsx [file Supplementary_tables_Fin00.xlsx]

## Sheet: Table_S1
Table S1. Inversion status determined by FISH in 103 HapMap individuals.
Cell line	FISH result	Population
GM07000	I N	CEUf
GM07019	I N	CEUT
GM07022	I Ia	CEUfT
GM07029	I I	CEU
GM07034	I N	CEUfT
GM07048	I I	CEUT
GM07055	I Id	CEUfT
GM07056	I N	CEUfT
GM07345	I N	CEUfT
GM07348	N N	CEUT
GM07349	I N	CEU
GM07357	N N	CEUfT
GM10831	I N	CEUT
GM10835	I N	CEUT
GM10839	I I	CEUT
GM10847	I Na	CEUT
GM10855	N N	CEUT
GM10858	I I	CEU
GM10859	I N	CEUT
GM10860	I N	CEUT
GM10861	I Ib	CEU
GM10863	I N	CEU
GM11829	I N	CEUf
GM11830	I N	CEUf
GM11831	N N	CEUfT
GM11832	N Na	CEUfT
GM11839	I I	CEUf
GM11840	I Na	CEUf
GM11881	I I	CEUfT
GM11882	I N	CEUfT
GM11982	I N	CEU
GM11992	I I	CEUfT
GM11993	I Na	CEUfT
GM11995	I I	CEUf
GM12003	I N	CEUf
GM12005	I I	CEUfT
GM12006	I N	CEUfT
GM12057	I I	CEUf
GM12144	I N	CEUf
GM12145	N N	CEUf
GM12146	I N	CEUfT
GM12154	I N	CEUf
GM12155	N N	CEUfT
GM12156	I Na,d	CEUfT
GM12236	I N	CEUf
GM12239	I N	CEUfT
GM12248	I N	CEUfT
GM12249	N Nd	CEUfT
GM12264	I Ia	CEUf
GM12707	I N	CEU
GM12740	I I	CEUT
GM12750	I N	CEUfT
GM12751	I N	CEUfT
GM12752	I N	CEUT
GM12753	I I	CEU
GM12760	N N	CEUfT
GM12761	I I	CEUfT
GM12762	I I	CEUf
GM12801	I N	CEU
GM12802	I N	CEU
GM12812	I N	CEUf
GM12814	I I	CEUf
GM12872	I N	CEUf
GM12873	I N	CEUf
GM12874	I I	CEUf
GM12878	I Ia	CEUT
GM12891	I N	CEUfT
GM12892	I N	CEUfT
GM18592	I N	CHB
GM18605	I N	CHB
GM18620	I Nd	CHB
GM18944	N N	JPT
GM18945	I N	JPT
GM18947	N Na	JPT
GM18949	N N	JPT
GM18951	N N	JPT
GM18952	I N	JPT
GM18953	N N	JPT
GM18959	N N	JPT
GM18960	I N	JPT
GM18964	I N	JPT
GM18966	I Na	JPT
GM18968	N N	JPT
GM18972	I N	JPT
GM18976	N N	JPT
GM18980	N Na	JPT
GM18987	I N	JPT
GM18998	I N	JPT
GM18504	N N	YRI
GM18508	N N	YRI
GM18516	I N	YRI
GM18523	N Na	YRI
GM18856	I I	YRI
GM18858	I N	YRI
GM18912	N N	YRI
GM19099	N N	YRI
GM19101	I N	YRI
GM19128	I N	YRI
GM19138	I I	YRI
GM19143	I I	YRI
GM19192	I N	YRI
GM19201	N N	YRI
GM19210	I I	YRI

## Sheet: Table_S2
Table S2. Optimal SNP sets for PFIDO use.
CEU (phase II)	CEU (phase III)	YRI
rs10081437	rs10090444	rs10046783
rs10086521	rs10096421	rs10081498
rs10087081	rs10104303	rs10085952
rs10087493	rs10283145	rs10086065
rs10087923	rs1039916	rs10086260
rs10088415	rs1039917	rs10086299
rs10089518	rs1045529	rs10086412
rs10090444	rs10503426	rs10086673
rs10093774	rs10903340	rs10086770
rs10094497	rs11249996	rs10086836
rs10096194	rs11249999	rs10086851
rs10096381	rs11250092	rs10086923
rs10096421	rs11250093	rs10086950
rs10097870*	rs11250099	rs10087256
rs10098322	rs11250130	rs10087406
rs10098488	rs11250131	rs10087493
rs10098618	rs11250163	rs10087512
rs10098699	rs1126089	rs10087768
rs10100209	rs1126092	rs10087914
rs10100215	rs11776838	rs10088134
rs10100265	rs11781637	rs10088224
rs10100760	rs11783247	rs10088259
rs10101399	rs11784052	rs10088283
rs10104303	rs11786541	rs10088284
rs10104353	rs11787026	rs10088365
rs10105315	rs11989640	rs10088853
rs10106207	rs11998678	rs10088975
rs10107145*	rs12541800	rs10089120
rs10108075	rs12542733	rs10089185
rs10108320	rs12543645	rs10089300
rs10108511*	rs12546366	rs10089339
rs10108618	rs12547493	rs10089414
rs10108729	rs12549151	rs10089552
rs10109026	rs12682352	rs10089651
rs10109886	rs13254942	rs10090444
rs10110008	rs13259143	rs10090505
rs10112645	rs13259216	rs10090729
rs10113808	rs13260727	rs10090884
rs10156356	rs13274028	rs10091586
rs10217044	rs13439415	rs10091637
rs1025395	rs1382567	rs10091799
rs10283145	rs1435277	rs10091950
rs1039915	rs1435282	rs10092288
rs1039916	rs1478890	rs10092329
rs1039917	rs1510934	rs10092549
rs1042701	rs1533058	rs10092600
rs1045527	rs1533059	rs10092705
rs1045529	rs1562211	rs10092720
rs1047950	rs1877119	rs10093774
rs10481451	rs1962073	rs10093805
rs10481454*	rs1986972	rs10094141
rs10503387	rs2001338	rs10094308
rs10503416	rs2246606	rs10094370
rs10503418	rs2249804	rs10094497
rs10503421	rs2250028	rs10094528
rs1057625	rs2288671	rs10095187
rs106380	rs2409096	rs10095390
rs1073913	rs2409756	rs10095612
rs10903321	rs2409784	rs10095834
rs10903340	rs2409798	rs10096085
rs10903342	rs2428	rs10096326
rs10903343	rs2572386	rs10096332
rs1123141	rs2572417	rs10096421
rs11249913	rs2572430	rs10096526
rs11249992	rs2572431	rs10096610
rs11249995	rs2572449	rs10096881
rs11249996	rs2572450	rs10097184
rs11249999	rs2736292	rs10097315
rs11250001	rs2736295	rs10097570
rs11250002	rs2736306	rs10097574
rs11250005	rs2736342	rs10097626
rs11250073	rs2736371	rs10097659
rs11250077	rs2736372	rs10098322
rs11250092	rs2898290	rs10098342
rs11250093	rs2921060	rs10098474
rs11250099	rs2921077	rs10098549
rs11250117	rs2975648	rs10098667
rs11250127	rs2976876	rs10098752
rs11250130	rs2979179	rs10098874
rs11250131	rs332040	rs10099021
rs11250138	rs3989373	rs10099072
rs11250146	rs4240671	rs10099100
rs11250151	rs4240673	rs10099182
rs11250157	rs4326350	rs10099338
rs11250163	rs4382480	rs10099571
rs11250164	rs448231	rs10099808
rs11250185	rs483916	rs10099819
rs11250188	rs4840362	rs10100203
rs1126089	rs4840567	rs10100209
rs1126091	rs4841042	rs10100449
rs1126092	rs4841051	rs10100552
rs1133184	rs4841071	rs10101132
rs11773913	rs4841407	rs10101195
rs11773990	rs4841409	rs10101673
rs11774353	rs6601280	rs10101900
rs11774541	rs6601427	rs10101904
rs11774552	rs6981573	rs10101985
rs11774572	rs6984496	rs10102073
rs11774673	rs6985109	rs10102613
rs11775625	rs6987558	rs10102621
rs11775769	rs6999466	rs10102703
rs11776020	rs7013471	rs10102766
rs11776838	rs7016139	rs10103188
rs11776973	rs7016385	rs10103434
rs11777002	rs7459532	rs10103466
rs11777364	rs7814795	rs10104303
rs11777976	rs7817376	rs10104376
rs11778121	rs7820738	rs10104571
rs11778398	rs7823056	rs10104607
rs11778453	rs7824557	rs10104807
rs11778739	rs7827182	rs10104950
rs11778830	rs7829381	rs10105409
rs11779061	rs7831557	rs10105548
rs11779205	rs7832708	rs10105588
rs11779875	rs7837587	rs10105659
rs11780774	rs7843666	rs10105815
rs11781637	rs891570	rs10105920
rs11782269	rs907180	rs10106250
rs11782375	rs907183	rs10106780
rs11782835	rs9329221	rs10106829
rs11783247*	rs9657519	rs10106838
rs11783249	rs978803	rs10106875
rs11783478	rs9969657	rs10107086
rs11783966		rs10107180
rs11784052		rs10107815
rs11784393		rs10107951
rs11784499		rs10108320
rs11784572		rs10108415
rs11784693		rs10108618
rs11784941		rs10108910
rs11785268		rs10108954
rs11785819		rs10109515
rs11786541		rs10109698
rs11786677		rs10110029
rs11787026		rs10110146
rs11987861		rs10110380
rs11989640		rs10110648
rs11990063		rs10110911
rs11991118		rs10111263
rs11991139		rs10111536
rs11991716		rs10111627
rs11994417		rs10111751
rs11995206		rs10112237
rs11998274		rs10112584
rs11998678		rs10112596
rs12114954		rs10112893
rs12156350		rs10113408
rs12156387		rs10113481
rs12334769		rs10113601
rs12541318		rs1017760
rs12541491		rs1017804
rs12541800		rs10216348
rs12542037*		rs10216570
rs12542733		rs10216844
rs12542888		rs10217044
rs12543645		rs10282848
rs12543685		rs10283037
rs12546366		rs10283145
rs12547493		rs1038248
rs12547955		rs1039912
rs12547997		rs1039916
rs12548025		rs1039917
rs12548428		rs10429305
rs12549144		rs10435712
rs12549150		rs1045527
rs12549151		rs1045528
rs12549629		rs1045529
rs12550244		rs1047643
rs12550668		rs10481450
rs12676417		rs10481451
rs12676995		rs10481455
rs12677146		rs10503375
rs12678797		rs10503380
rs12678800		rs10503381
rs12678938		rs10503382
rs12680762		rs10503389
rs12681987		rs10503390
rs12682352		rs10503391
rs12785		rs10503393
rs12898		rs10503395
rs1293291		rs10503400
rs1293320		rs10503403
rs13248109		rs10503404
rs13249929		rs10503406
rs13250781		rs10503407
rs13252210		rs10503408
rs13252589		rs10503409
rs13252797		rs10503416
rs13252982		rs10503418
rs13254175		rs10503419
rs13254263		rs10503423
rs13254942		rs10503424
rs13256092		rs1052453
rs13257831		rs1053036
rs13258627		rs1055328
rs13259143		rs1057750
rs13259216		rs1060106
rs13260727		rs1062219
rs13261384		rs1073913
rs13262031		rs1079326
rs13263482		rs10903310
rs13265731		rs10903312
rs13267180		rs10903323
rs13270146		rs10903327
rs13270267*		rs10903330
rs13271489		rs10903336
rs13271797		rs10903338
rs13272061*		rs10903340
rs13274028		rs10903342
rs13274269		rs10903343
rs13276836		rs1112331
rs13277113		rs1123141
rs13277114		rs11249878
rs13278753		rs11249884
rs13278965		rs11249885
rs13279067		rs11249895
rs13280813		rs11249904
rs13282106		rs11249905
rs13439415		rs11249913
rs1347410		rs11249925
rs1351876		rs11249926
rs1382563		rs11249927
rs1382567*		rs11249928
rs1401390		rs11249929
rs1435277		rs11249943
rs1435282		rs11249961
rs1461727		rs11249967
rs1478890		rs11249979
rs1478892		rs11249987
rs1478894		rs11249991
rs1478901		rs11249992
rs1484639		rs11249994
rs1484640		rs11249996
rs1510934		rs11249999
rs1533058		rs11250004
rs1533059		rs11250007
rs1543238		rs11250010
rs1562211		rs11250017
rs1567398		rs11250024
rs1600250		rs11250025
rs1600252		rs11250045
rs1616534		rs11250047
rs1692799		rs11250061
rs1703982		rs11250064
rs17149332		rs11250077
rs17149727		rs11250080
rs17149807		rs11250082
rs17151588		rs11250090
rs17154995		rs11250092
rs1719381		rs11250093
rs1736090		rs11250099
rs17594065		rs11250103
rs17594423		rs11250109
rs17595502		rs11250110
rs17602960		rs11250111
rs17603787		rs11250123
rs17665878		rs11250130
rs17666595		rs11250139
rs17689674		rs11250141
rs17690549		rs11250149
rs17693945		rs11250152
rs17694485		rs11250154
rs17697237		rs11250168
rs17700611		rs11250186
rs17701675		rs11250205
rs17702602		rs11250213
rs17709397		rs1126089
rs17724226		rs1126092
rs17724467		rs1133184
rs17730481		rs1139843
rs17734541		rs1160369
rs17734690		rs11773913
rs17741537		rs11773947
rs17747335		rs11774104
rs17750324		rs11774221
rs17751178		rs11774353
rs17765901		rs11774388
rs17778581		rs11774411
rs17780806		rs11774569
rs17783634		rs11774673
rs17796285		rs11774792
rs17797443		rs11774860
rs17797894		rs11774870
rs1809357		rs11775290
rs1865521		rs11775334
rs1877119		rs11775625
rs1897950		rs11775702
rs189798		rs11775769
rs1900102		rs11775845
rs19334		rs11776020
rs1960357		rs11776081
rs1962073		rs11776257
rs1971412		rs11776368
rs1986972		rs11776838
rs1991651		rs11776995
rs2001329		rs11777086
rs2001338		rs11777274
rs2001433		rs11777364
rs2001707		rs11777846
rs2016297		rs11777887
rs2030279		rs11777918
rs2055729		rs11777976
rs2060456		rs11778091
rs2060457		rs11778398
rs2060459		rs11778453
rs2060465		rs11778739
rs2061830		rs11778747
rs2062331		rs11778848
rs2062332		rs11778913
rs2062333		rs11779061
rs2099456		rs11779181
rs2116093		rs11779336
rs2116095		rs11779639
rs2127127		rs11780704
rs2138851		rs11780774
rs2139204		rs11780979
rs2140125		rs11781203
rs2163379		rs11781511
rs2164272		rs11781637
rs2164273		rs11781781
rs2199690*		rs11781985
rs2244894		rs11782090
rs2244931		rs11782269
rs2246606		rs11782281
rs2249804		rs11782826
rs2250028		rs11782835
rs2256241		rs11782868
rs2272597		rs11782884
rs2272598		rs11783013
rs2277130		rs11783045
rs2288671		rs11783143
rs2293855		rs11783183
rs2293856		rs11783803
rs2293859		rs11784048
rs2293860		rs11784052
rs2409096		rs11784061
rs2409665		rs11784144
rs2409669		rs11784552
rs2409676		rs11784572
rs2409689		rs11784580
rs2409691		rs11784750
rs2409694		rs11784779
rs2409710		rs11784888
rs2409712		rs11784941
rs2409713		rs11785067
rs2409714		rs11785434
rs2409715		rs11785739
rs2409716		rs11785930
rs2409718		rs11786170
rs2409722		rs11786541
rs2409742		rs11786942
rs2409745		rs11787026
rs2409749		rs11787370
rs2409756		rs11787390
rs2409764		rs11787414
rs2409773		rs11787443
rs2409784		rs11986177
rs2409798		rs11986564
rs2409807		rs11986748
rs2409836		rs11987373
rs2428*		rs11988920
rs2572371		rs11989193
rs2572382		rs11989369
rs2572385		rs11989467
rs2572386		rs11989783
rs2572397		rs11989918
rs2572398*		rs11989996
rs2572406		rs11990063
rs2572417		rs11990096
rs2572418		rs11990167
rs2572430		rs11990229
rs2572431		rs11990277
rs2572446		rs11990376
rs2572449		rs11990446
rs2572450		rs11990550
rs2572452		rs11991118
rs2618434		rs11991121
rs2618443		rs11991607
rs2618451		rs11991621
rs2618476		rs11991747
rs2645396		rs11993512
rs2729940		rs11993591
rs2736280		rs11993663
rs2736282		rs11993746
rs2736283		rs11994018
rs2736286		rs11994417
rs2736288		rs11995244
rs2736290		rs11995447
rs2736292		rs11995449
rs2736295		rs11995470
rs2736306		rs11996027
rs2736311		rs11996033
rs2736313		rs11996245
rs2736340		rs11996321
rs2736342*		rs11996486
rs2736371		rs11996714
rs2736372		rs11996795
rs2736374		rs11997297
rs2736381		rs11997346
rs2898257		rs11997943
rs2898260		rs11998382
rs2898290		rs11998591
rs2898295		rs12056794
rs2915251		rs12114375
rs2921060		rs12115113
rs2921077		rs12115130
rs2921381		rs12155586
rs2929305		rs12155819
rs2929308		rs12156238
rs2929451		rs12156245
rs2929452		rs12234997
rs2929453		rs12234999
rs2929454		rs12235038
rs2929466		rs12334460
rs2945230		rs12334949
rs2945232		rs12335194
rs2945238		rs12375394
rs2945251		rs12540961
rs2945269		rs12541355
rs2945873		rs12541800
rs2945886		rs12542104
rs2945891		rs12542146
rs2948286		rs12542733
rs2948300		rs12542888
rs2948305		rs12543766
rs2953802		rs12543996
rs2955578		rs12544019
rs2955587		rs12544511
rs2956244		rs12544785
rs2975731		rs12544801
rs2976876		rs12544932
rs2976893		rs12546026
rs2976906		rs12546054
rs2976907		rs12546366
rs2976909		rs12546760
rs2976926		rs12546910
rs2976929		rs12546950
rs2976933		rs12547012
rs2976940		rs12547146
rs2976945		rs12547493
rs2979151		rs12547955
rs2979172		rs12547997
rs2979179		rs12548428
rs2979202		rs12548959
rs2979206		rs12549128
rs2979247		rs12549151
rs2979256		rs12549696
rs2979265		rs12549726
rs2980426		rs12549964
rs2980436		rs12550244
rs2980437		rs12550437
rs2980439		rs12550485
rs2980508		rs12550733
rs3021494		rs12550829
rs3021500		rs12674649
rs3088186		rs12674871
rs3105738		rs12675279
rs3258		rs12675645
rs330048		rs12676145
rs330049		rs12676417
rs330050		rs12676436
rs330054		rs12676613
rs330056		rs12676995
rs330904		rs12677146
rs330905		rs12677326
rs330908		rs12677843
rs330910		rs12678414
rs330915		rs12678827
rs330920		rs12678938
rs330921		rs12679360
rs330923		rs12679609
rs330933		rs12679687
rs330938		rs12679862
rs332040		rs12679869
rs367543		rs12679892
rs3735819		rs12680355
rs3750310		rs12680471
rs3779891		rs12680985
rs3808509		rs12681005
rs3808513		rs12681298
rs3808518		rs12681987
rs3827806		rs12719915
rs3827808		rs12750
rs3925830		rs12898
rs3989373		rs1293288
rs4078186		rs1293298
rs408459		rs1293303
rs411831		rs1293320
rs4133242		rs1293322
rs4240645		rs1293328
rs4240671		rs1293330
rs4240672		rs1296023
rs4240673		rs1296028
rs4240677		rs1298295
rs427370		rs1299525
rs4292737		rs13031
rs4294187		rs13248287
rs4310166		rs13248300
rs4321967		rs13249013
rs4326350		rs13249929
rs4333549		rs13249940
rs435581		rs13250449
rs4382480		rs13250935
rs4395858		rs13251198
rs439989		rs13254942
rs4403412		rs13256028
rs4410870		rs13256068
rs4413734		rs13256234
rs4433149		rs13258495
rs448231		rs13258730
rs4503102		rs13259216
rs4521760		rs13259232
rs4523214		rs13259547
rs4523255		rs13260325
rs4568581		rs13260727
rs4568582		rs13262031
rs4577961		rs13262643
rs4598253		rs13264212
rs4610752		rs13264774
rs483916		rs13265363
rs4840362		rs13265553
rs4840376		rs13266699
rs4840426		rs13268996
rs4840467		rs13269639
rs4840474		rs13269822
rs4840516		rs13269921
rs4840542		rs13270146
rs4840549		rs13270983
rs4840565		rs13271797
rs4840567		rs13272745
rs4840568		rs13272793
rs4841026		rs13272989
rs4841029		rs13273009
rs4841042		rs13273152
rs4841044		rs13273161
rs4841051		rs13273672
rs4841071		rs13274028
rs4841077		rs13274269
rs4841083		rs13276433
rs4841282		rs13277114
rs4841294		rs13277477
rs4841295		rs13279794
rs4841296		rs13280813
rs4841311		rs13281575
rs4841317		rs13282106
rs4841329		rs13282174
rs4841352		rs13282211
rs4841356		rs13438913
rs4841401		rs13439411
rs4841407		rs13439811
rs4841408		rs1367506
rs4841409		rs1381350
rs4841411		rs1382563
rs4841436		rs1393
rs4841452		rs1394
rs4841465		rs1399054
rs4841489		rs1402525
rs4841490		rs1430866
rs4841495		rs1435277
rs4841498		rs1435282
rs4841500		rs1458942
rs4841501		rs1461729
rs4841504		rs1466338
rs4841507		rs1466785
rs4841525		rs1469557
rs4841580		rs1478894
rs4841600		rs1478895
rs4841601		rs1478897
rs4841659		rs1478900
rs491364		rs1484641
rs5029571		rs1484642
rs506960		rs1484648
rs522483		rs14879
rs534523		rs1510934
rs555200		rs1514024
rs560638		rs1517622
rs567958		rs1521187
rs572366		rs1521190
rs591346		rs1521194
rs592420		rs1522839
rs615632		rs1530484
rs635594		rs1533058
rs643955		rs1533059
rs656319		rs1534862
rs657913		rs1534863
rs658385		rs1544981
rs6601274		rs1545073
rs6601280		rs1547559
rs6601281		rs1548198
rs6601282		rs1560971
rs6601389		rs1562211
rs6601414		rs1567398
rs6601415		rs1567834
rs6601427		rs1567837
rs6601450		rs1574517
rs6601451		rs1600249
rs6601455		rs1616534
rs6601465		rs1692793
rs6601513		rs1692808
rs6601522		rs1692821
rs6601523		rs1703974
rs6601529		rs1703975
rs6601542		rs17149317
rs6601544		rs17149528
rs6601561		rs17149544
rs6601562		rs17149548
rs6601564		rs17149564
rs6601572		rs17149598
rs6601573		rs17149611
rs6601574		rs17149618
rs6601575		rs17149621
rs6601576		rs17149646
rs6601577		rs17149669
rs6601578		rs17149723
rs6601582		rs17149836
rs6601585		rs17149947
rs6601662		rs17149950
rs6601686		rs17149982
rs6601689		rs17149988
rs6601700		rs17149989
rs6731		rs17149991
rs6748		rs17150077
rs678250		rs17150131
rs686189		rs17150181
rs688491		rs17150203
rs6980805		rs17150237
rs6980856		rs17150793
rs6981023		rs17150795
rs6981573		rs17151026
rs6982308		rs17151050
rs6983129		rs17151064
rs6983150		rs17151069
rs6983332		rs17151108
rs6983727		rs17151128
rs6983877		rs17151145
rs6984496		rs17151147
rs6985109*		rs17151155
rs6985146		rs17151175
rs6985207		rs17151193
rs6985460		rs17151195
rs6985501		rs17151201
rs6986032		rs17151209
rs6986911		rs17151222
rs6987558		rs17151235
rs6989160		rs17151237
rs6989657		rs17151239
rs6990746		rs17151244
rs6991074		rs17151257
rs6991606		rs17151405
rs6991930		rs17151550
rs6992818		rs17151588
rs6993494		rs17151637
rs6993610		rs17151667
rs6993841		rs17151675
rs6995404		rs17151728
rs6995407		rs17151731
rs6995837		rs17151759
rs6995859		rs17151824
rs6996943		rs17151843
rs6997997		rs17151854
rs6998387		rs17151885
rs6999466		rs17151892
rs7000276		rs17151901
rs7001187		rs17151903
rs7002117		rs17151969
rs7002282		rs17152296
rs7002693		rs17152302
rs7003360		rs17152305
rs7004254		rs17152315
rs7004362		rs17152345
rs7004604		rs17152349
rs7004825		rs17152366
rs7005133		rs17152370
rs7005363		rs17152410
rs7005469		rs17152442
rs7005904		rs17152492
rs7006589		rs17152520
rs7007394		rs17152623
rs7010590		rs17152626
rs7011229		rs17152636
rs7011756		rs17152650
rs7011781		rs17152653
rs7013277		rs17152673
rs7013471		rs17152718
rs7014953		rs17152782
rs7015168		rs17152785
rs7015336		rs17152793
rs7016139		rs17152795
rs7016385		rs17152797
rs7016671		rs17152841
rs7017868		rs17152862
rs7018397		rs17152884
rs712253		rs17152909
rs718427		rs17152942
rs718741		rs17152978
rs719409		rs17152997
rs7386213		rs17153088
rs7459532		rs17153118
rs7460395		rs17153139
rs7460436		rs17153140
rs7460507		rs17153181
rs7461062		rs17153188
rs7464263		rs17153220
rs7465262		rs17153240
rs755856		rs17153280
rs764738		rs17153419
rs765731		rs17153437
rs777707		rs17153457
rs777709		rs17153465
rs7813802		rs17153509
rs7814757		rs17153516
rs7814795		rs17153551
rs7816713		rs17153596
rs7816990		rs17153698
rs7817376		rs17153743
rs7819412		rs17153755
rs7819827		rs17153785
rs7820738		rs17153887
rs7820860		rs17154027
rs7821006		rs17154339
rs7821092		rs17154363
rs7821826		rs17154375
rs7821914		rs17154379
rs7822109		rs17154478
rs7822958		rs17154500
rs7823056		rs17154599
rs7823296		rs17154698
rs7823349		rs17154769
rs7823808		rs17154776
rs7824557		rs17154792
rs7824675		rs17154854
rs7825778		rs17154857
rs7826238		rs17154921
rs7826987		rs17154992
rs7827182		rs17154995
rs7829381*		rs17155036
rs7829396		rs17155065
rs7829975		rs17155162
rs7830431		rs17155176
rs7831039		rs17155227
rs7831557*		rs17155236
rs7832398		rs17155244
rs7832708		rs17155246
rs7832722		rs17155252
rs7832968		rs17155321
rs7833387		rs17155367
rs7833781		rs17155382
rs7833945		rs17155393
rs7834466		rs172957
rs7835318		rs1736058
rs7836059		rs1736078
rs7836459		rs1736090
rs7836953		rs1736093
rs7837038		rs17594093
rs7837316		rs17594870
rs7837587		rs17603933
rs7837979		rs17604113
rs7838131		rs17616779
rs7840344		rs17617027
rs7840347		rs17628982
rs7841082		rs17657675
rs7842154		rs17658270
rs7843470		rs17660164
rs7843666		rs17661379
rs7843789		rs17663167
rs7845203		rs17663618
rs793505		rs17664371
rs793506		rs17666595
rs793508		rs17669632
rs793510		rs17669947
rs793728		rs17683510
rs793753		rs17684514
rs804282		rs17692624
rs804283		rs17693451
rs810738		rs17697237
rs814359		rs17700611
rs877116		rs17701675
rs891570		rs17703328
rs898137		rs17703591
rs899364		rs17707436
rs907180*		rs17707988
rs907181		rs17711111
rs907183		rs17711248
rs920047		rs17720365
rs922483		rs17722940
rs9286062		rs17724226
rs9329167		rs17725044
rs9329175		rs17725480
rs9329191		rs17725534
rs9329221		rs17726209
rs9329223		rs17728678
rs958648		rs17729883
rs9644687		rs17732433
rs9650616		rs17734290
rs9657519		rs17734541
rs9657521		rs17737355
rs978802*		rs17737587
rs978803*		rs17739113
rs9969466		rs17739179
rs9969626		rs17741537
rs9969657		rs17744726
rs998683		rs17746245
		rs17747335
		rs17748267
		rs17748464
		rs17750324
		rs17751178
		rs17756892
		rs17765901
		rs17767108
		rs17767186
		rs17774023
		rs17774398
		rs17774627
		rs17776427
		rs17776622
		rs17776946
		rs17782554
		rs17795704
		rs17807624
		rs1809006
		rs1850725
		rs1850726
		rs1870788
		rs1874546
		rs1877119
		rs1877693
		rs1877696
		rs1878560
		rs1900102
		rs1905634
		rs1914825
		rs1914826
		rs1962073
		rs1962392
		rs1968853
		rs1971412
		rs1986346
		rs1986357
		rs1986358
		rs1986677
		rs1986972
		rs1986973
		rs1991651
		rs1993596
		rs1994020
		rs1994223
		rs1996864
		rs2004678
		rs2010390
		rs2043507
		rs2046400
		rs2052963
		rs2054343
		rs2055729
		rs2060456
		rs2060457
		rs2060459
		rs2060465
		rs2077869
		rs2082775
		rs2085640
		rs2099456
		rs2100021
		rs2100700
		rs2102658
		rs2117616
		rs2126259
		rs2127128
		rs2137787
		rs2163379
		rs2164272
		rs2164273
		rs2169385
		rs2169889
		rs2177254
		rs2196295
		rs2242281
		rs2244750
		rs2246521
		rs2246606
		rs2248334
		rs2248932
		rs2249259
		rs2249804
		rs2249824
		rs2249831
		rs2250028
		rs2250056
		rs2250562
		rs2250903
		rs2253061
		rs2254546
		rs2254797
		rs2254891
		rs2256087
		rs2256612
		rs2256647
		rs2264306
		rs2264307
		rs2264865
		rs2271355
		rs2272767
		rs2280802
		rs2280803
		rs2292369
		rs2292370
		rs2293855
		rs2293856
		rs2293859
		rs2293860
		rs2294140
		rs2294143
		rs2409096
		rs2409122
		rs2409572
		rs2409596
		rs2409598
		rs2409618
		rs2409654
		rs2409655
		rs2409669
		rs2409674
		rs2409691
		rs2409694
		rs2409709
		rs2409718
		rs2409719
		rs2409720
		rs2409722
		rs2409730
		rs2409742
		rs2409744
		rs2409745
		rs2409748
		rs2409750
		rs2409756
		rs2409764
		rs2409772
		rs2409773
		rs2409775
		rs2409781
		rs2409784
		rs2409798
		rs2409805
		rs2409812
		rs2409836
		rs2428
		rs2467517
		rs2572371
		rs2572385
		rs2572386
		rs2572406
		rs2572430
		rs2572431
		rs2572449
		rs2572450
		rs2618443
		rs2618451
		rs2618455
		rs2618466
		rs2618479
		rs2645399
		rs2645408
		rs2645413
		rs2645414
		rs2645415
		rs2645437
		rs2645450
		rs2661747
		rs2686187
		rs2686206
		rs2736271
		rs2736277
		rs2736282
		rs2736283
		rs2736286
		rs2736295
		rs2736306
		rs2736312
		rs2736313
		rs2736316
		rs2736324
		rs2736327
		rs2736351
		rs2736352
		rs2736360
		rs2736368
		rs2736370
		rs2736372
		rs2736374
		rs2736379
		rs2736381
		rs2740438
		rs2740444
		rs2740592
		rs28465197
		rs28540652
		rs28592224
		rs28622563
		rs28685039
		rs2898208
		rs2898215
		rs2898223
		rs2898248
		rs2898250
		rs2898254
		rs2898261
		rs2898264
		rs2898265
		rs2898280
		rs2921004
		rs2921005
		rs2921010
		rs2921016
		rs2921023
		rs2921024
		rs2921026
		rs2921044
		rs2921060
		rs2921077
		rs2921080
		rs2921084
		rs2921092
		rs2921098
		rs2929286
		rs2929287
		rs2929290
		rs2929295
		rs2929296
		rs2929305
		rs2929312
		rs2929313
		rs2929451
		rs2929453
		rs2929457
		rs2929460
		rs2929464
		rs2929465
		rs2929466
		rs2929470
		rs2929475
		rs2929478
		rs2945230
		rs2945251
		rs2945861
		rs2945880
		rs2945883
		rs2945891
		rs2945910
		rs2945912
		rs2948300
		rs2948587
		rs2948588
		rs2952161
		rs2952166
		rs2952172
		rs2952174
		rs2952185
		rs2952194
		rs2952221
		rs2952223
		rs2952224
		rs2952248
		rs2952250
		rs2952254
		rs2953802
		rs2955590
		rs2975647
		rs2975648
		rs2975649
		rs2975654
		rs2975659
		rs2975668
		rs2975676
		rs2975684
		rs2975687
		rs2975693
		rs2975696
		rs2975701
		rs2975720
		rs2975722
		rs2975723
		rs2975726
		rs2975734
		rs2975735
		rs2976862
		rs2976871
		rs2976874
		rs2976887
		rs2976893
		rs2976909
		rs2976921
		rs2976929
		rs2976933
		rs2976941
		rs2976956
		rs2976966
		rs2976972
		rs2979146
		rs2979151
		rs2979153
		rs2979154
		rs2979164
		rs2979202
		rs2979207
		rs2979210
		rs2979213
		rs2979224
		rs2979243
		rs2979245
		rs2979246
		rs2979269
		rs2980429
		rs2980436
		rs2980437
		rs2980747
		rs2980748
		rs2980751
		rs2980754
		rs3021494
		rs3021495
		rs3021496
		rs3088186
		rs3102070
		rs3258
		rs329985
		rs329990
		rs329992
		rs329995
		rs329997
		rs330003
		rs330023
		rs330033
		rs330035
		rs330048
		rs330049
		rs330061
		rs330062
		rs330063
		rs330064
		rs330065
		rs330068
		rs330069
		rs330071
		rs330085
		rs330087
		rs330089
		rs330094
		rs330096
		rs330101
		rs330911
		rs330920
		rs330923
		rs330941
		rs330944
		rs332013
		rs34275385
		rs365309
		rs366099
		rs366178
		rs367543
		rs373204
		rs3735814
		rs3736014
		rs3736015
		rs3748140
		rs3750314
		rs3750315
		rs3779663
		rs3779891
		rs378974
		rs379547
		rs3802235
		rs3808513
		rs3808518
		rs3808603
		rs3824211
		rs3827811
		rs3827812
		rs3885690
		rs3885723
		rs3947
		rs396121
		rs398801
		rs3989158
		rs3989373
		rs399123
		rs400404
		rs403245
		rs405001
		rs4074083
		rs4074356
		rs4078186
		rs408459
		rs410487
		rs4128298
		rs4128324
		rs41393948
		rs41408944
		rs419658
		rs4240617
		rs4240619
		rs4240625
		rs4240637
		rs4240641
		rs4240649
		rs4240658
		rs4240661
		rs4240668
		rs4240671
		rs4240677
		rs4240678
		rs4255099
		rs4255142
		rs4260896
		rs4268132
		rs4269499
		rs4272382
		rs4272426
		rs4282526
		rs4289816
		rs4294187
		rs4295669
		rs4305909
		rs4307299
		rs4307347
		rs430949
		rs4310164
		rs4310165
		rs4319098
		rs4335130
		rs433724
		rs433960
		rs4342552
		rs4349949
		rs435581
		rs4357293
		rs4361726
		rs4367542
		rs4368940
		rs4370496
		rs4370534
		rs4380891
		rs4382429
		rs4382480
		rs4383973
		rs4391437
		rs4395858
		rs4398919
		rs4400345
		rs4404875
		rs4404876
		rs4404920
		rs4406360
		rs4410868
		rs4412337
		rs4413734
		rs4427133
		rs4433149
		rs4448276
		rs4451268
		rs4455884
		rs4458915
		rs4471098
		rs4474025
		rs4474027
		rs4480076
		rs448231
		rs4484650
		rs4490835
		rs4496971
		rs4498602
		rs4503102
		rs4504596
		rs4504641
		rs4507728
		rs4510815
		rs4517127
		rs4520167
		rs4521760
		rs4529465
		rs4531010
		rs4532561
		rs4537306
		rs4538888
		rs4551364
		rs4563888
		rs4570161
		rs4576391
		rs4581006
		rs4582517
		rs4595128
		rs4604434
		rs4606064
		rs4606065
		rs4623376
		rs4624992
		rs4637782
		rs471480
		rs473034
		rs473258
		rs481061
		rs4839
		rs483916
		rs4840341
		rs4840344
		rs4840346
		rs4840362
		rs4840374
		rs4840384
		rs4840393
		rs4840410
		rs4840426
		rs4840435
		rs4840437
		rs4840463
		rs4840475
		rs4840480
		rs4840502
		rs4840503
		rs4840508
		rs4840516
		rs4840517
		rs4840518
		rs4840528
		rs4840530
		rs4840563
		rs4840567
		rs4840599
		rs484074
		rs4840939
		rs4840946
		rs4840947
		rs4840948
		rs4840974
		rs4840975
		rs4840976
		rs4840980
		rs4840986
		rs4840989
		rs4840991
		rs4841000
		rs4841003
		rs4841004
		rs4841005
		rs4841019
		rs4841020
		rs4841021
		rs4841026
		rs4841029
		rs4841042
		rs4841051
		rs4841055
		rs4841071
		rs4841077
		rs4841080
		rs4841085
		rs4841087
		rs4841088
		rs4841092
		rs4841097
		rs4841098
		rs4841102
		rs4841106
		rs4841108
		rs4841110
		rs4841112
		rs4841138
		rs4841139
		rs4841147
		rs4841154
		rs4841162
		rs4841163
		rs4841165
		rs4841171
		rs4841200
		rs4841214
		rs4841215
		rs4841218
		rs4841234
		rs4841239
		rs4841248
		rs4841251
		rs4841261
		rs4841284
		rs4841287
		rs4841294
		rs4841295
		rs4841297
		rs4841304
		rs4841306
		rs4841318
		rs4841321
		rs4841324
		rs4841328
		rs4841331
		rs4841334
		rs4841347
		rs4841352
		rs4841364
		rs4841366
		rs4841367
		rs4841380
		rs4841389
		rs4841390
		rs4841398
		rs4841404
		rs4841405
		rs4841406
		rs4841407
		rs4841409
		rs4841424
		rs4841436
		rs4841449
		rs4841455
		rs4841458
		rs4841462
		rs4841476
		rs4841486
		rs4841498
		rs4841507
		rs4841511
		rs4841527
		rs4841529
		rs4841537
		rs4841539
		rs4841554
		rs4841578
		rs4841600
		rs4841601
		rs4841603
		rs4841604
		rs4841662
		rs4841663
		rs4841678
		rs4841689
		rs499005
		rs500115
		rs5002815
		rs5002891
		rs5023278
		rs5029571
		rs505710
		rs506276
		rs517394
		rs534667
		rs537231
		rs542203
		rs554241
		rs556819
		rs559534
		rs565169
		rs568927
		rs570364
		rs572366
		rs576405
		rs580393
		rs580415
		rs582027
		rs583484
		rs586123
		rs591258
		rs598113
		rs598523
		rs609792
		rs614197
		rs615171
		rs625218
		rs633777
		rs635594
		rs638703
		rs6422374
		rs656070
		rs656319
		rs657086
		rs659256
		rs6601265
		rs6601280
		rs6601284
		rs6601285
		rs6601296
		rs6601300
		rs6601301
		rs6601302
		rs6601306
		rs6601307
		rs6601327
		rs6601340
		rs6601372
		rs6601391
		rs6601405
		rs6601407
		rs6601409
		rs6601427
		rs6601431
		rs6601438
		rs6601443
		rs6601447
		rs6601456
		rs6601459
		rs6601479
		rs6601481
		rs6601485
		rs6601491
		rs6601503
		rs6601505
		rs6601513
		rs6601518
		rs6601521
		rs6601522
		rs6601523
		rs6601524
		rs6601529
		rs6601534
		rs6601536
		rs6601537
		rs6601538
		rs6601540
		rs6601541
		rs6601544
		rs6601548
		rs6601549
		rs6601558
		rs6601563
		rs6601564
		rs6601578
		rs6601627
		rs6601643
		rs6601649
		rs6601690
		rs6601692
		rs6601693
		rs6601694
		rs6601700
		rs6601709
		rs6601719
		rs6601724
		rs6601728
		rs6601729
		rs661310
		rs6731
		rs6748
		rs677039
		rs678250
		rs682400
		rs686189
		rs69526
		rs6980655
		rs6980856
		rs6980952
		rs6981023
		rs6981546
		rs6981750
		rs6981847
		rs6982453
		rs6982679
		rs6982806
		rs6983129
		rs6983180
		rs6983727
		rs6983870
		rs6983956
		rs6984094
		rs6984111
		rs6984231
		rs6984496
		rs6984551
		rs6984615
		rs6984624
		rs6984737
		rs6984840
		rs6984939
		rs6985068
		rs6985140
		rs6985218
		rs6985267
		rs6985349
		rs6985460
		rs6985564
		rs6985570
		rs6985671
		rs6986254
		rs6986275
		rs6986287
		rs6986647
		rs6986755
		rs6987057
		rs6987083
		rs6987224
		rs6987259
		rs6987277
		rs6987558
		rs6987571
		rs6988046
		rs6988236
		rs6988281
		rs6988325
		rs6988972
		rs6989066
		rs6989109
		rs6989299
		rs6989332
		rs6989370
		rs6989535
		rs6989657
		rs6989772
		rs6989782
		rs6989793
		rs6989817
		rs6989930
		rs6990041
		rs6990097
		rs6990134
		rs6990282
		rs6990300
		rs6990313
		rs6990463
		rs6990464
		rs6990589
		rs6990764
		rs6990888
		rs6991074
		rs6991227
		rs6991234
		rs6991328
		rs6991385
		rs6991499
		rs6991853
		rs6992247
		rs6992269
		rs6992312
		rs6992349
		rs6992366
		rs6992432
		rs6992818
		rs6993135
		rs6993523
		rs6993632
		rs6993755
		rs6993775
		rs6993841
		rs6994059
		rs6994742
		rs6994806
		rs6995374
		rs6995759
		rs6996029
		rs6996347
		rs6996752
		rs6997224
		rs6997361
		rs6997416
		rs6997710
		rs6997765
		rs6998594
		rs6998999
		rs6999196
		rs6999270
		rs6999466
		rs6999631
		rs6999875
		rs7000055
		rs7000205
		rs7000335
		rs7000407
		rs7000483
		rs7000695
		rs7000939
		rs7000959
		rs7001266
		rs7001675
		rs7001721
		rs7001723
		rs7001736
		rs7001819
		rs7001821
		rs7002117
		rs7002282
		rs7002397
		rs7002551
		rs7002917
		rs7003129
		rs7003826
		rs7003840
		rs7004362
		rs7004553
		rs7004769
		rs7004998
		rs7005030
		rs7005216
		rs7005328
		rs7005531
		rs7005905
		rs7006402
		rs7006443
		rs7006543
		rs7006589
		rs7006628
		rs7006707
		rs7006727
		rs7006947
		rs7007439
		rs7007712
		rs7007897
		rs7007974
		rs7008383
		rs7008392
		rs7008486
		rs7008658
		rs7008804
		rs7009514
		rs7009672
		rs7009724
		rs7009845
		rs7009920
		rs7010154
		rs7010166
		rs7010246
		rs7010670
		rs7010709
		rs7011229
		rs7011400
		rs7011778
		rs7011784
		rs7011821
		rs7012244
		rs7012388
		rs7012395
		rs7013277
		rs7013369
		rs7013686
		rs7013746
		rs7013834
		rs7013960
		rs7014565
		rs7014601
		rs7014604
		rs7014953
		rs7015336
		rs7015453
		rs7015455
		rs7015700
		rs7015768
		rs7016361
		rs7016636
		rs7016671
		rs7016808
		rs7017116
		rs7017212
		rs7017739
		rs7017819
		rs7017872
		rs7018002
		rs7018397
		rs712253
		rs718742
		rs719409
		rs720081
		rs724029
		rs728877
		rs732947
		rs7350066
		rs735449
		rs7357476
		rs7386213
		rs7388458
		rs7459728
		rs7460226
		rs7460395
		rs7460507
		rs7462672
		rs7462794
		rs7464820
		rs7465039
		rs7465262
		rs747749
		rs752446
		rs753012
		rs755320
		rs764738
		rs777706
		rs777707
		rs777709
		rs777710
		rs7812517
		rs7813037
		rs7813355
		rs7813389
		rs7813802
		rs7813830
		rs7813831
		rs7813863
		rs7814228
		rs7814507
		rs7814570
		rs7814667
		rs7814795
		rs7815168
		rs7815184
		rs7815294
		rs7815324
		rs7815685
		rs7816040
		rs7816547
		rs7816713
		rs7816990
		rs7817148
		rs7817452
		rs7817757
		rs7817793
		rs7818169
		rs7818181
		rs7818276
		rs7818294
		rs7818307
		rs7818396
		rs7818421
		rs7819338
		rs7819412
		rs7819733
		rs7820492
		rs7820738
		rs7820917
		rs7821075
		rs7821130
		rs7821327
		rs7821432
		rs7821559
		rs7821773
		rs7822400
		rs7822481
		rs7822664
		rs7822666
		rs7822872
		rs7822958
		rs7823349
		rs7823376
		rs7823537
		rs7823610
		rs7824019
		rs7824225
		rs7824675
		rs7824704
		rs7824895
		rs7825188
		rs7825818
		rs7825984
		rs7826139
		rs7826180
		rs7826189
		rs7826230
		rs7826458
		rs7826478
		rs7826486
		rs7826519
		rs7827573
		rs7827623
		rs7827929
		rs7828059
		rs7828271
		rs7828601
		rs7829381
		rs7829463
		rs7829733
		rs7829843
		rs7830402
		rs7830429
		rs7830939
		rs7831022
		rs7831039
		rs7831172
		rs7831557
		rs7831579
		rs7831663
		rs7831994
		rs7832347
		rs7832398
		rs7832423
		rs7832431
		rs7832468
		rs7832477
		rs7832521
		rs7832708
		rs7832722
		rs7833051
		rs7833103
		rs7833217
		rs7833246
		rs7833521
		rs7834351
		rs7834497
		rs7834573
		rs7834638
		rs7835349
		rs7835507
		rs7836066
		rs7836248
		rs7836366
		rs7836377
		rs7836459
		rs7836668
		rs7836718
		rs7837520
		rs7837584
		rs7837828
		rs7837995
		rs7838051
		rs7838399
		rs7838913
		rs7839174
		rs7839585
		rs7839648
		rs7839837
		rs7839849
		rs7839902
		rs7840347
		rs7840785
		rs7841403
		rs7841407
		rs7841581
		rs7841628
		rs7841921
		rs7842096
		rs7842214
		rs7842261
		rs7842443
		rs7842777
		rs7842910
		rs7843154
		rs7843504
		rs7843666
		rs7843906
		rs7844115
		rs7845203
		rs7845493
		rs7845970
		rs7846007
		rs7846023
		rs7846207
		rs7846328
		rs7846361
		rs7846545
		rs7846549
		rs793506
		rs804267
		rs804280
		rs804292
		rs814421
		rs814422
		rs814424
		rs8180912
		rs8191510
		rs8191513
		rs8191551
		rs8191604
		rs8191612
		rs8191649
		rs8191663
		rs8191674
		rs8191682
		rs8417
		rs867757
		rs867858
		rs876954
		rs877116
		rs877390
		rs880632
		rs883836
		rs885000
		rs891560
		rs891570
		rs892793
		rs895253
		rs898798
		rs899363
		rs899366
		rs9009
		rs904006
		rs904011
		rs904017
		rs907180
		rs920047
		rs920974
		rs922483
		rs922484
		rs923046
		rs930992
		rs9329175
		rs9329176
		rs9329185
		rs9329186
		rs9329188
		rs9329203
		rs9329221
		rs9329222
		rs9329223
		rs9329228
[truncated: 41 more rows]

## Sheet: Table_S3
Table S3. SNPs genotyped in 1,748 white British individuals.
dbSNP ID	Position	Missing (%)	HWE (p)	Platform	Passed QC
rs4272426	11763932	0	0.7437	Illumina	Y
rs9650663	11761635	0	1	Illumina	Y
rs7819301	11756048	0	1	Illumina	Y
rs7831946	11755599	0.1134	0.7081	Illumina	Y
rs9644757	11755513	0	0.2003	Illumina	Y
rs1736130	11748623	0.05672	0.1707	Illumina	Y
rs7818169	11747232	0	0.04778	Illumina	Y
rs2645408	11746358	0.3971	0.5304	Illumina	Y
rs11783694	11746122	0.1134	0.607	Illumina	Y
rs10108205	11745945	0	0.7539	Illumina	Y
rs1630828	11745820	0	0.1308	Illumina	Y
rs11996898	11743049	0.1134	0.08334	Illumina	Y
rs1736124	11737891	0.1702	0.7361	Illumina	Y
rs1619003	11734618	0.05672	0.04757	Illumina	Y
rs1692804	11730094	0.05672	0.3063	Illumina	Y
rs1293309	11723775	0.1134	0.00785	Illumina	Y
rs1299525	11722125	0.3971	0.5197	Illumina	Y
rs2645415	11722046	0.1134	0.03978	Illumina	Y
rs1293306	11721080	2.099	0.0193	Sequenom	Y
rs1293288	11718528	0.1702	0.8243	Illumina	Y
rs6980952	11716473	0.1702	0.5802	Illumina	Y
rs17814360	11713158	1.872	0.5522	Sequenom	Y
rs1293298	11712443	4.084	0.1735	Illumina	Y
rs1293297	11711473	0	0.6516	Illumina	Y
rs12338	11710888	0.7374	0.9117	Illumina	Y
rs1293294	11710703	0	1	Illumina	Y
rs2294140	11705677	0.1702	1	Illumina	Y
rs17573	11704650	2.269	1	Sequenom	Y
rs9009	11702006	0.2269	0.6114	Illumina	Y
rs1296028	11698747	0.05672	0.359	Illumina	Y
rs8944	11696492	0.05672	0.1522	Illumina	Y
rs3258	11696352	0.1702	0.9021	Illumina	Y
rs1293328	11695060	0.05672	0.3522	Illumina	Y
rs1296025	11694650	0.05672	0.6865	Illumina	Y
rs6995787	11694604	2.439	0.15	Sequenom	Y
rs1298295	11688485	0	0.3202	Illumina	Y
rs4841600	11688148	0	0.1082	Illumina	Y
rs2294137	11687959	0	0.09251	Illumina	Y
rs12676995	11687159	0.1702	0.8997	Illumina	Y
rs1123141	11686835	0.1702	0.9004	Illumina	Y
rs962366	11684403	0.1702	0.9137	Illumina	Y
rs904011	11683653	0	1	Illumina	Y
rs17149412	11681838	0	0.06773	Illumina	Y
rs1293300	11680007	0	1	Illumina	Y
rs3779663	11671362	0	0.5947	Illumina	Y
rs1736058	11671041	0	0.04617	Illumina	Y
rs6991234	11670932	0	0.4779	Illumina	Y
rs8417	11667179	0	0.01835	Illumina	Y
rs1616534	11666451	0	0.827	Illumina	Y
rs9650662	11661566	0	0.0236	Illumina	Y
rs12056593	11661467	0	1	Illumina	Y
rs17524895	11660136	25.07	1	Sequenom	Y
rs2645437	11657033	1.702	0.6641	Sequenom	Y
rs2686187	11654796	2.893	0.1541	Sequenom	Y
rs10503424	11653825	0	1	Illumina	Y
rs2645444	11651553	0.3971	0.5524	Illumina	Y
rs7001819	11650475	0	0.9117	Illumina	Y
rs2686184	11649359	3.971	0.5745	Illumina	Y
rs2645447	11648874	0.1134	0.07459	Illumina	Y
rs2740444	11648789	1.929	0.6006	Sequenom	Y
rs2088349	11648067	0.1134	0.8023	Illumina	Y
rs904015	11646934	0	0.909	Illumina	Y
rs1043180	11644821	0	0.7767	Illumina	Y
rs6997097	11643972	0	1	Illumina	Y
rs804292	11643915	2.212	0.7708	Sequenom	Y
rs8191666	11643693	0	1	Illumina	Y
rs8191664	11643553	0	1	Illumina	Y
rs8191663	11643459	0	0.8816	Illumina	Y
rs6982453	11641871	0	0.5234	Illumina	Y
rs8191620	11639188	0	1	Illumina	Y
rs1874546	11638878	0.1134	0.2369	Illumina	Y
rs6601606	11638244	0	1	Illumina	Y
rs8191613	11637276	0	1	Illumina	Y
rs8191607	11636933	3.006	1	Sequenom	Y
rs8191604	11636884	0.05672	0.8888	Illumina	Y
rs804256	11636862	2.269	0.4194	Sequenom	Y
rs4840583	11635946	0	1	Illumina	Y
rs8191589	11634194	0.1702	0.8871	Illumina	Y
rs8191542	11629809	0.3971	1	Illumina	Y
rs8191534	11629367	0.05672	0.4634	Illumina	Y
rs804267	11629241	0	0.1787	Illumina	Y
rs804269	11629119	0.2269	0.2634	Illumina	Y
rs2686211	11628375	0.05672	0.3761	Illumina	Y
rs904009	11628129	0.1134	0.4711	Illumina	Y
rs1466785	11623456	0.1134	0.5156	Illumina	Y
rs17153785	11622865	0	0.274	Illumina	Y
rs2740431	11619261	0	0.6413	Illumina	Y
rs809204	11619163	0.2836	0.416	Illumina	Y
rs9329248	11618107	0.2836	0.1176	Illumina	Y
rs12458	11617240	0.1134	0.6261	Illumina	Y
rs11785481	11617142	4.311	0.2396	Illumina	Y
rs12825	11616547	0.1134	0.8232	Illumina	Y
rs1062219	11616410	0.3403	0.01377	Illumina	Y
rs7830178	11615876	0	1	Illumina	Y
rs4841588	11614225	0.8508	0.27	Illumina	Y
rs804280	11612698	0.1134	0.5147	Illumina	Y
rs13273672	11612381	0.2269	0.274	Illumina	Y
rs13262643	11612279	0.1134	0.2964	Illumina	Y
rs804282	11611743	0	0.9156	Illumina	Y
rs17153747	11611353	0	0.5547	Illumina	Y
rs804283	11611043	0.1134	0.395	Illumina	Y
rs804284	11610746	0.2269	0.2957	Illumina	Y
rs2645400	11609416	0.1134	0.454	Illumina	Y
rs2740434	11608905	0.1702	0.06405	Illumina	Y
rs7006733	11607990	0.2269	0.1502	Illumina	Y
rs3779664	11607048	0.1134	0.6275	Illumina	Y
rs10503425	11606364	0.1134	0.1686	Illumina	Y
rs2409814	11606152	0.1134	0.1075	Illumina	Y
rs2173117	11605130	0.05672	0.2429	Illumina	Y
rs2029969	11604858	0.2269	0.1206	Illumina	Y
rs13275657	11601075	1.021	0.01844	Illumina	Y
rs11785912	11600233	0.1134	0.5612	Illumina	Y
rs10090884	11599570	0	0.6413	Illumina	Y
rs7827193	11597046	0.3403	1	Illumina	Y
rs11250163	11596437	0	0.01898	Illumina	Y
rs1390950	11595829	0	0.0916	Illumina	Y
rs12541318	11594970	0.05672	0.05082	Illumina	Y
rs13259242	11593033	0	0.0144	Illumina	Y
rs6983129	11591136	0	0.3379	Illumina	Y
rs17153698	11590008	0.2269	0.8179	Illumina	Y
rs10096189	11588439	0	0.3705	Illumina	Y
rs4840579	11584425	0	0.1271	Illumina	Y
rs2898292	11582929	0	0.4088	Illumina	Y
rs10112596	11579802	0	0.715	Illumina	Y
rs6601605	11577908	0	1	Illumina	Y
rs6601604	11575518	0	0.7892	Illumina	Y
rs13278753	11570977	0.1134	0.9087	Illumina	Y
rs6990313	11570036	0.1134	0.7277	Illumina	Y
rs10088151	11565087	0.1134	1	Illumina	Y
rs2409810	11547790	0.1134	1	Illumina	Y
rs10110029	11546101	0	1	Illumina	Y
rs11784691	11541697	0.1702	0.7842	Illumina	Y
rs11784455	11540724	0	0.6455	Illumina	Y
rs4840575	11536638	0.3403	0.7813	Illumina	Y
rs4510815	11533384	0.1134	0.8014	Illumina	Y
rs10903342	11530493	0.1134	0.7496	Illumina	Y
rs4495391	11529752	0	1	Illumina	Y
rs11777330	11529198	0	1	Illumina	Y
rs11774712	11522606	0	1	Illumina	Y
rs4841580	11517977	0	0.1066	Illumina	Y
rs4394350	11517715	0.1702	0.3887	Illumina	Y
rs4841578	11516373	0.1134	0.3742	Illumina	Y
rs17153607	11515193	0.05672	0.6522	Illumina	Y
rs13254568	11514144	0.1134	0.85	Illumina	Y
rs2248334	11514071	0	0.04103	Illumina	Y
rs729985	11513733	0	0.3656	Illumina	Y
rs10903340	11450587	0.1134	0.02875	Illumina	Y
rs13270267	11444837	1.985	0.05189	Sequenom	Y
rs10097870	11444516	4.765	0.05015	Sequenom	Y
rs2409798	11435564	2.95	0.08404	Sequenom	Y
rs10108511	11435516	0.1134	0.02483	Illumina	Y
rs7464263	11434176	0.05672	0.043	Illumina	Y
rs2898290	11433909	1.929	0.04091	Sequenom	Y
rs2572398	11178093	100	1	Sequenom	N
rs2572397	11176403	1.305	0.06592	Sequenom	Y
rs10481454	11109303	1.021	0.04083	Sequenom	Y
rs4841465	10819854	0.05672	0.02463	Illumina	Y
rs11250099	10818657	1.872	0.01286	Sequenom	Y
rs12546366	10802146	0	0.1067	Illumina	Y
rs4240673	10787612	0.2836	0.03162	Illumina	Y
rs7823296	10778546	0	0.1335	Illumina	Y
rs6985109	10761585	0	0.06875	Illumina	Y
rs10107145	10758213	0	0.1622	Illumina	Y
rs10090444	10745469	0	0.08716	Illumina	Y
rs7843666	10742059	0	0.07047	Illumina	Y
rs2409676	10722058	2.155	1	Sequenom	Y
rs4841456	10721128	4.027	1	Sequenom	Y
rs10097412	10718974	1.815	1	Sequenom	Y
rs17777835	10718061	1.418	0.5361	Sequenom	Y
rs7004043	10717039	2.552	0.3306	Sequenom	Y
rs2292369	10716028	2.552	0.5134	Sequenom	Y
rs877116	10712945	1.588	0.6545	Sequenom	Y
rs17152619	10710199	99.09	1	Sequenom	N
rs10089153	10707974	2.042	1	Sequenom	Y
rs7012879	10706960	2.155	0.4266	Sequenom	Y
rs17721089	10705438	2.836	0.5295	Sequenom	Y
rs11990167	10704398	2.779	1	Sequenom	Y
rs7830431	10700317	40.61	7.37e-31	Sequenom	N
rs1052523	10692242	1.588	0.6129	Sequenom	Y
rs11546306	10690474	3.63	1	Sequenom	Y
rs2292371	10690244	2.609	0.7144	Sequenom	Y
rs12375394	10689212	1.645	1	Sequenom	Y
rs4841452	10687121	8.792	0.0009679	Sequenom	N
rs17152584	10685851	2.212	0.268	Sequenom	Y
rs10109416	10684755	3.971	0.9022	Sequenom	Y
rs17776946	10682674	2.155	0.5199	Sequenom	Y
rs2033368	10678333	1.588	0.7862	Sequenom	Y
rs13270324	10676575	1.191	1	Sequenom	Y
rs17152542	10675735	1.361	0.7096	Sequenom	Y
rs12155811	10673513	12.71	0.6276	Sequenom	Y
rs17776404	10672829	3.063	0.7475	Sequenom	Y
rs6601530	10671272	3.573	0.1924	Sequenom	Y
rs6995541	10671260	3.573	0.5159	Sequenom	Y
rs6601528	10667300	2.439	1	Sequenom	Y
rs7002282	10666993	2.439	0.6567	Sequenom	Y
rs6983180	10660117	1.305	0.6229	Sequenom	Y
rs11774361	10659939	1.815	1	Sequenom	Y
rs11998382	10659517	2.893	0.6337	Sequenom	Y
rs10113332	10654161	2.496	0.4715	Sequenom	Y
rs10503410	10652352	2.439	0.8709	Sequenom	Y
rs12679010	10647783	2.439	1	Sequenom	Y
rs9657541	10643164	2.893	0.7416	Sequenom	Y
rs7834466	10634805	1.588	0.7392	Sequenom	Y
rs17774331	10631226	3.29	0.6342	Sequenom	Y
rs17774023	10626333	1.475	0.5195	Sequenom	Y
rs12682565	10626280	1.645	0.2686	Sequenom	Y
rs891559	10623803	2.439	0.5295	Sequenom	Y
rs35530857	10623280	1.985	1	Sequenom	Y
rs17855458	10623254	4.765	1	Sequenom	Y
rs17711777	10623240	1.815	0.6117	Sequenom	Y
rs1078543	10623138	2.723	0.4819	Sequenom	Y
rs34656824	10622954	4.141	1	Sequenom	Y
rs919555	10618176	3.46	0.08106	Sequenom	Y
rs10110552	10615459	2.779	0.2377	Sequenom	Y
rs7831557	10280228	2.836	0.03136	Sequenom	Y
rs4610752	10248962	0	0.005682	Illumina	Y
rs10283145	10241411	0	0.003882	Illumina	Y
rs9329221	10240202	0	0.0125	Illumina	Y
rs435581	9029413	0.05672	0.1375	Illumina	Y
rs330943	9021026	3.744	0.6111	Sequenom	Y
rs330938	9017979	0.2269	0.635	Illumina	Y
rs19334	9009906	0.1134	0.6121	Illumina	Y
rs3748140	8999019	0	1	Illumina	Y
rs17653841	8998022	0.1134	1	Illumina	Y
rs13264959	8997975	1.815	0.2702	Sequenom	Y
rs330921	8997623	0.1702	0.08344	Illumina	Y
rs17704885	8997562	0	0.3881	Illumina	Y
rs330915	8996936	0.1702	0.1228	Illumina	Y
rs7459730	8996760	0.05672	1	Illumina	Y
rs330911	8996273	0.1134	0.1541	Illumina	Y
rs330908	8995166	1.929	0.1948	Illumina	Y
rs12785	8994936	0.1702	0.1398	Illumina	Y
rs9949	8994512	0.2836	0.1771	Illumina	Y
rs7008494	8984093	0.1702	0.6414	Illumina	Y
rs6981573	8821318	0.1702	0.4099	Illumina	Y
rs1039916	8685854	0.3403	0.2857	Illumina	Y

## Sheet: Table_S4
Table S4. Global 8p23-inv frequencies.
Population	AF	HWE	n	Distance from AA	Dataset	Reference
Mozabite	0.79	1	28	4893	HGDP	CEU
Bantu	0.761905	0.291941	21	4883.58	Xing et al	YRI
French Basque	0.73	0.291194	24	6981	HGDP	CEU
LWK	0.73	0.401529	77	1866	HapMap	YRI
YRI	0.73	0.212358	101	4028	HapMap	YRI
Dogon	0.725	0.590817	20	6809.67	Xing et al	YRI
Yoruba	0.72	0.559299	18	3890	HGDP	YRI
Orcadian	0.7	0.53943	15	7969	HGDP	CEU
Mandenka	0.68	1	20	5858	HGDP	YRI
Bantu-speaking	0.63	0.577811	15	2650	HGDP	YRI
Italian	0.63	0.647256	20	6144	HGDP	CEU
CEU	0.6	0.700673	114	6653	HapMap	CEU
Bambaran	0.6	0.384814	20	6719.21	Xing et al	YRI
TSI	0.59	0.186145	87	6278	HapMap	CEU
Slovenian	0.58	0.22444	25	6441.12	Xing et al	CEU
UK	0.57	0.701491	2833	7350	WTCCC	CEU
Adygei	0.56	0.34278	17	5350	HGDP	CEU
Bedouin	0.54	0.233364	45	2853	HGDP	CEU
Sardinian	0.54	1	28	6587	HGDP	CEU
French	0.52	1	27	6707	HGDP	CEU
Kalash	0.52	1	22	6409	HGDP	CEU
Druze	0.51	0.748412	39	2986	HGDP	CEU
Russian	0.5	1	25	6763	HGDP	CEU
Pakistani	0.5	1	21	6930.4	Xing et al	CEU
Palestinian	0.49	0.770149	45	2986	HGDP	CEU
Iraqi Kurd	0.478261	0.420947	23	3871.73	Xing et al	CEU
Daghestani	0.45	0.649587	20	6041.38	Xing et al	CEU
AP Brahmin	0.434783	1	23	7847.92	Xing et al	CEU
Balochi	0.43	0.185978	22	5997	HGDP	CEU
INS	0.42	1	83	7497	SGVP	CEU
Pathan	0.41	0.372907	22	6586	HGDP	CEU
Brahui	0.4	0.216809	24	5997	HGDP	CEU
Makrani	0.38	0.642094	21	5824	HGDP	CEU
Sindhi	0.35	0.66207	23	6359	HGDP	CEU
Hazara	0.33	0.342347	21	6586	HGDP	CEU
Yakut	0.33	0.0575543	20	12448	HGDP	JPT
Mongol	0.31	0.233931	16	10844	HGDP	JPT
Irula	0.261905	0.578115	21	8086.56	Xing et al	JPT
Burusho	0.26	1	25	6669	HGDP	CEU
Manchu	0.25	0.269437	22	10134	HGDP	JPT
Mala/Madiga	0.230769	1	13	7847.92	Xing et al	CEU
Buryat	0.225	0.528256	20	11132.9	Xing et al	JPT
Japanese	0.2	0.544273	23	13095	HGDP	JPT
MAS	0.19	0.0590239	74	11985	SGVP	JPT
Tongan/Samoan	0.1875	0.55094	24	22312.1	Xing et al	JPT
Hmong	0.18	1	17	10951	HGDP	JPT
JPT	0.16	0.111884	82	13410	HapMap	JPT
Lolo	0.16	0.562067	34	9960	HGDP	JPT
Han	0.13	1	38	10763	HGDP	JPT
CHS	0.12	0.595771	83	11453	SGVP	JPT
CHD	0.11	0.586043	71	13410	HapMap	JPT
CHB	0.1	1	71	13410	HapMap	JPT
Totonac	0.05	1	20	23895.9	Xing et al	JPT
Karitiana	0	1	14	27980	HGDP	JPT
Maya	0	1	20	23359	HGDP	JPT
Papuan	0	1	17	17134	HGDP	JPT
Pima	0	1	13	21109	HGDP	JPT
Abbreviations:
CEU	Centre díEtude du Polymorphisme Humain collected in Utah, USA, with ancestry from northern and western Europe
CHB	Han Chinese in Beijing, China
CHD	Chinese in metropolitan Denver, Colorado, USA
CHS	Chinese in Singapore
INS	Indians in Singapore
JPT	Japanese in Tokyo, Japan
LWK	Luhya in Webuye, Kenya
MAS	Malays in Singapore
TSI	Tuscans in Italy
YRI	Yoruba in Ibadan, Nigeria

## Sheet: Table_S5
Table S5A. Associations between inversion status and mRNA level.
Region annotation	Effect	Holm-adjusted p	Probe/AE window	Dataset
BLK	-0.369	5.85e-07	GI_33469981-S	5
BLK	-0.451	1.65435e-06	206255_at	3
BLK	-0.0775039	6.92588e-06	chr8:11414199-11457704	2
BLK	-0.42	8.5476e-06	210934_at	3
BLK	-0.517184	0.000630754	GI_33469981-S	1 (CEU)
BLK	-0.0712288	0.00109746	chr8:11389321-11413675	2
BLK-FAM167A intergenic	-0.20385	7.11596e-09	chr8:11361874-11388428	2
BLK, intron 1	-0.295	0.0156757	244394_at	3
CTSB	0.0427572	0.0202876	chr8:11739342-11759534	2
CTSB	0.266147	0.0241809	GI_22538429-A	1 (CEU)
FAM167A	0.459	1.24e-10	GI_32698772-S	5
FAM167A	0.556	2.18592e-10	226614_s_at	3
FAM167A	0.143655	0.000111237	chr8:11318295-11358702	2
FAM167A-TDH intergenic	0.127165	0.0288476	chr8:11274385-11315556	2
FLJ10661	0.474	8.88066e-08	1562904_s_at	3
FLJ10661	0.298	0.0215534	234049_at	3
MFHAS1	-0.0641602	0.00292558	chr8:8702032-8711011	2
MTMR9	0.0412911	0.000361232	chr8:11190367-11193698	2
PPP1R3B	0.223577	0.00816968	10025906756	4
PPP1R3B	0.0980421	0.00862132	GI_13375814-S	1 (YRI)
PPP1R3B	0.128566	0.0152913	GI_13375814-S	1 (CEU)
PPP1R3B-THEX1 intergenic	0.0592666	0.00478116	chr8:8929054-8938550	2
Upstream of CLDN23	0.0829404	0.0224698	chr8:8540847-8594630	2
XKR6, intron 1	0.587	2.23e-18	GI_33300646-S	5
XKR6, intron 1	0.615	3.40496e-14	236047_at	3
XKR6, intron 1	-0.306	7.49e-05	Hs.125914-S	5
XKR6, intron 1	0.0745402	0.000435744	chr8:10801455-10819098	2
XKR6, intron 1	0.0802186	0.00360185	chr8:10895667-10917927	2
XKR6, intron 1	0.103319	0.00617051	chr8:10825022-10839512	2
XKR6, intron 1	0.0373512	0.0104894	chr8:10951643-10970278	2
Table S5B.Associations between inversion status and allele-expression (AE) window conditioned on specific SNPs.
Region annotation	Probe/AE window	SNP Covariate	Holm-adjusted p
Upstream of CLDN23	chr8:8540847-8594630	rs6994131	NS
MFHAS1	chr8:8702032-8711011	rs678250	NS
PPP1R3B-THEX1 intergenic	chr8:8929054-8938550	rs13277114	NS
XKR6, intron 1	chr8:10801455-10819098	rs1529598	NS
XKR6, intron 1	chr8:10825022-10839512	rs7840344	NS
XKR6, intron 1	chr8:10895667-10917927	rs11250099	NS
XKR6, intron 1	chr8:10951643-10970278	rs6991930	NS
MTMR9	chr8:11190367-11193698	rs10503418	NS
FAM167A-TDH intergenic	chr8:11274385-11315556	rs2736340	NS
FAM167A	chr8:11318295-11358702	rs2736340	NS
BLK-FAM167A intergenic	chr8:11361874-11388428	rs2736340	0.00245567
BLK-FAM167A intergenic	chr8:11361874-11388428	rs4840568	1.23411e-05
BLK-FAM167A intergenic	chr8:11361874-11388428	rs1382567	NS
BLK	chr8:11389321-11413675	rs2618476	NS
BLK	chr8:11414199-11457704	rs2618476	NS
CTSB	chr8:11739342-11759534	rs1293288	NS
Table S5C. SNPs used to construct median-joining network of CEU haplotypes influencing BLK-FAM167A mRNA levels.
rs7830501
rs2199690
rs7812879
rs2254891
rs978802
rs7839644
rs978803
rs978804
rs2736340
rs2618473
rs7829381
rs1600250
rs1600252
rs2618474
rs1478899
rs2736342
rs4840567
rs1478900
rs1478901
rs7822109
rs13277113
rs17153343
rs2251056
rs2736344
rs9694294
rs1382567
rs4840568
rs922483
rs13272061
rs2736345
rs2618476
rs998683
rs998682
rs1478895
rs7829697
rs2618481
rs10089316
rs2250412
rs4606022
rs1478890
rs2618479
rs2618478

## Sheet: Table_S6
Table S6. Estimation of the 8p23-inv Evolutionary Age.
						Evolutionary Age Estimate (mya)
						PTR outgroup		PPY outgroup
Alignment	Genomic coordinates (hg18)	BAC-1	BAC-2	PID	K	Time	SE	Time	SE
HSA_PTR_PPY	chr8:11570969-11583429	AC090790	AC069185	99.9989	0.00104989	0.507346	0.140737	0.371632	0.10309
HSA_PTR_PPY	chr8:11778972-11803128	AC025857	AC107918	99.8526	0.00147568	0.440388	0.0744661	0.446032	0.0754206
HSA_PTR_PPY	chr8:8156705-8180014	AC087342	AC068353	99.9218	0.000782299	0.223242	0.0541533	0.261616	0.063462
HSA_PTR_PPY	chr8:9131260-9142743	AC022784	AC021736	99.9976	0.00239674	0.933207	0.179743	0.838139	0.161432
HSA_PTR_PPY	chr8:9166362-9178084	AC022784	AC021736	99.9979	0.0026028	0.763243	0.123894	0.862572	0.140017
HSA_PTR_PPY	chr8:9946763-9961095	AC023385	AC034111	99.9981	0.00146798	0.601851	0.150514	0.426954	0.106775
HSA_PTR	chr8:9943056-9975055	AC023385	AC034111	99.9983	0.00169534	0.514335	0.070023	NA	NA
HSA_PTR	chr8:10166445-10181193	AC079200	AC112673	99.9974	0.00259233	0.758051	0.123051	NA	NA
HSA_PTR	chr8:8156705-8180014	AC087342	AC068353	99.9218	0.000735427	0.215189	0.0521993	NA	NA
HSA_PTR	chr8:11778972-11803128	AC025857	AC107918	99.8526	0.00145943	0.43207	0.0730593	NA	NA
HSA_PTR	chr8:11570969-11587613	AC090790	AC069185	99.9989	0.0011465	0.483757	0.111003	NA	NA
HSA_PTR	chr8:8657977-8676093	AC090567	AC087269	99.997	0.00304944	0.856023	0.115499	NA	NA
HSA_PTR	chr8:9123616-9146644	AC022784	AC021736	99.9979	0.00206255	0.647276	0.094461	NA	NA
HSA_PTR	chr8:9164270-9179035	AC022784	AC021736	99.9978	0.00218174	0.46208	0.0817172	NA	NA
HSA_PTR	chr8:9151681-9163285	AC022784	AC021736	99.9984	0.00156895	0.433768	0.102297	NA	NA

## Sheet: Table_S7
Table S7. “Amplification Refractory Mutation System” primers.
Event	Fwd	Rev	Target RPCI-11 Haplotype
1	CAAGGAGGAGGGACACAATC	GGACAGACCCAGAAACACACA	AC134395
1	CAAGGAGGAGGGACACAATC	GGACAGACCCAGAAACACACG	AC130360
1	CAAGGAGGAGGGACACAATT	GGACAGACCCAGAAACACACA	AC105214
2	CCCTGCCCCTCTCTGTCA	GTGCAGACCAGAATATCGCTCA	AC148106
2	CCCTGCCCCTCTCTGTCG	GTGCAGACCAGAATATCGCCCT	AC084121
3	TTAAGGTGGAGAAGAGCAGGT	AGGGATTGGGAGGAGCA	AC092766
3	TTAAGGTGGAGAAGAGCAGGC	AGGGATTGGGAGGAGCA	AC068020
3	GCACCATTTTAGCTGACACT	TGGGCTCTGTCCATGT	AC092766
5	ACTGGGACATGGTTAGAC	ACACCAGGATTTGTACGT	AC130352
5	ACTGGGACATGGTTAGAA	ACACCAGGATTTGTACGT	AC068020
5	AGCACTGGGACATGGTTAGAC	ACACCAGGATTTGCACGG	AC105214
